# Supplementary material
Source: Research Square preprint supplement (doi:10.21203/rs.3.rs-8843012/v1)
Supplement: Supplementary file 1 [file 722234acba3cc9c5e3e4df1b.docx]

# Questionnaire

We are conducting a survey on Chinese hotpot and barbecue buffet restaurants. This questionnaire is strictly anonymous, and all data will be used for academic analysis only. We sincerely invite you to participate. You are free to withdraw at any time if you feel uncomfortable. Thank you for your support!

## Filter Questions

1. Are you above 18 years of age? □ Yes □ No
2. Do you have any reasons that you will not visit Chinese hot pot and barbecue buffet restaurants? □ Yes □ No
3. Have you dined at Chinese hot pot and barbecue buffet restaurants in the last three months?□ Yes □ No

## Scenario Comprehension

Can you understand this scenario? (Only the respondents who can understand the scenario can proceed with the survey) □ Yes □ No

### Rating Scale: 1=Strongly Disagree 7=Strongly Agree

Please circle the corresponding number for each statement below:

1. Food wastage makes me feel guilty about the wastage of resources. 1 2 3 4 5 6 7
2. Food wastage gives me a bad conscience. 1 2 3 4 5 6 7
3. Food wastage is against my morals. 1 2 3 4 5 6 7
4. Food wastage makes me feel bad. 1 2 3 4 5 6 7
5. Food wastage gives me a feeling of regret. 1 2 3 4 5 6 7
6. I feel ashamed if I waste food even if nobody is aware of my action. 1 2 3 4 5 6 7
7. When ordering ingredients, I intend not to order too much to throw food away. 1 2 3 4 5 6 7
8. When ordering ingredients, my goal is not to order too much to throw food. 1 2 3 4 5 6 7
9. When ordering ingredients, I will try not to order too much to throw food away. 1 2 3 4 5 6 7

## Demographic Details

1. Gender: □ Male □ Female
2. Age: □ 18-20 □ 21-30 □ 31-40 □ 41-50 □ >50
3. Education: □ High school or below □ Diploma □ University Degree □ Postgraduate
