# Supplementary material
Source: Research Square preprint supplement (doi:10.21203/rs.3.rs-8843012/v1)
Supplement: Supplementary file 2 [file d9e9ef5bc2c7f050d9d1e647.xlsx]

## Sheet: study 1- 181 DATA
MN-1	MN-2	MN-3	MN-4	MN-5	MN-6	MN-MEAN	IN-1	IN-2	IN-3	IN-MEAN	gender	age	education	CONDITON
6	5	7	6	5	6	5.83333	5	4	4	4.33333	1	1	1	0
5	4	4	5	5	5	4.66667	4	5	4	4.33333	2	1	1	0
6	5	7	5	6	7	6	5	6	6	5.66667	2	1	1	0
4	5	4	6	4	4	4.5	6	5	6	5.66667	1	1	1	0
4	5	5	6	7	6	5.5	4	5	6	5	1	1	1	0
5	5	7	6	5	5	5.5	5	6	6	5.66667	1	1	1	0
4	4	5	5	4	4	4.33333	4	5	6	5	1	1	1	0
5	6	4	4	5	4	4.66667	4	5	4	4.33333	1	1	1	0
7	6	6	5	6	6	6	6	6	5	5.66667	1	1	2	0
5	4	4	5	5	5	4.66667	4	6	4	4.66667	1	1	2	0
5	4	4	5	5	5	4.66667	4	4	4	4	2	1	2	0
6	5	6	6	6	5	5.66667	5	6	6	5.66667	2	1	2	0
6	5	5	6	7	6	5.83333	6	6	7	6.33333	2	1	3	0
6	5	6	6	6	6	5.83333	6	6	7	6.33333	1	1	4	0
6	6	6	6	6	6	6	6	7	6	6.33333	2	1	1	0
6	7	6	6	7	6	6.33333	5	6	6	5.66667	2	1	1	1
6	5	7	6	6	7	6.16667	6	7	6	6.33333	1	1	1	1
6	5	6	5	6	7	5.83333	7	6	6	6.33333	1	1	1	1
4	5	6	6	5	5	5.16667	4	7	6	5.66667	1	1	1	1
6	5	7	6	6	6	6	6	6	7	6.33333	2	1	1	1
7	7	7	6	7	6	6.66667	5	5	6	5.33333	2	1	3	1
3	6	6	4	5	4	4.66667	7	5	6	6	1	2	1	0
6	5	6	4	5	4	5	4	6	6	5.33333	1	2	1	0
6	7	5	6	5	6	5.83333	6	6	6	6	2	2	2	0
5	5	6	7	6	6	5.83333	4	4	5	4.33333	2	2	2	0
6	6	6	6	6	5	5.83333	5	5	6	5.33333	2	2	2	0
5	7	6	5	6	6	5.83333	7	6	7	6.66667	2	2	2	0
5	5	5	4	6	5	5	6	5	5	5.33333	2	2	2	0
4	5	6	6	7	7	5.83333	6	7	5	6	2	2	2	0
6	6	5	6	5	6	5.66667	6	6	6	6	2	2	2	0
5	4	4	5	5	5	4.66667	4	5	4	4.33333	2	2	2	0
5	4	4	5	5	5	4.66667	4	5	4	4.33333	2	2	2	0
6	5	6	6	6	6	5.83333	5	6	6	5.66667	2	2	2	0
6	5	5	5	6	6	5.5	6	5	6	5.66667	2	2	2	0
5	5	5	5	6	5	5.16667	5	5	6	5.33333	2	2	2	0
4	3	3	3	4	4	3.5	4	4	3	3.66667	2	2	2	0
4	5	4	4	5	4	4.33333	4	5	4	4.33333	2	2	2	0
6	6	5	7	5	5	5.66667	6	5	6	5.66667	2	2	2	0
6	7	6	6	6	5	6	5	4	4	4.33333	2	2	2	0
6	6	6	6	6	6	6	5	6	6	5.66667	2	2	2	0
5	7	5	6	5	5	5.5	6	5	6	5.66667	2	2	2	0
5	6	7	6	6	6	6	6	5	6	5.66667	2	2	2	0
5	5	5	6	5	5	5.16667	6	5	6	5.66667	2	2	2	0
6	6	7	6	6	6	6.16667	5	5	5	5	1	2	2	0
6	6	5	7	5	5	5.66667	5	6	6	5.66667	1	2	2	0
6	5	5	6	5	5	5.33333	5	6	6	5.66667	1	2	2	0
6	5	6	5	5	5	5.33333	5	6	6	5.66667	1	2	2	0
7	5	5	6	6	6	5.83333	4	4	5	4.33333	1	2	2	0
5	4	4	5	5	5	4.66667	4	6	4	4.66667	1	2	2	0
5	6	6	7	6	5	5.83333	5	5	6	5.33333	1	2	2	0
6	7	5	6	5	5	5.66667	6	5	6	5.66667	1	2	2	0
6	6	6	6	7	7	6.33333	5	5	6	5.33333	1	2	2	0
5	5	5	5	6	5	5.16667	6	6	7	6.33333	1	2	2	0
7	5	6	7	7	7	6.5	5	5	6	5.33333	1	2	2	0
7	5	6	6	7	6	6.16667	7	7	6	6.66667	1	2	2	0
6	6	6	6	6	6	6	4	4	5	4.33333	1	2	2	0
5	4	4	5	5	5	4.66667	4	5	4	4.33333	1	2	3	0
5	4	4	5	5	5	4.66667	4	4	4	4	1	2	3	0
6	6	5	5	5	5	5.33333	6	4	6	5.33333	1	2	3	0
5	4	4	5	5	5	4.66667	4	4	4	4	1	2	3	0
6	6	7	6	5	6	6	6	4	6	5.33333	1	2	3	0
6	5	6	6	6	6	5.83333	5	4	6	5	2	2	3	0
7	5	4	5	7	5	5.5	4	4	4	4	2	2	3	0
5	5	6	6	6	6	5.66667	5	4	6	5	2	2	3	0
5	6	5	5	5	6	5.33333	6	5	6	5.66667	2	2	3	0
5	6	6	6	6	6	5.83333	5	4	6	5	2	2	3	0
5	6	5	6	5	6	5.5	6	5	6	5.66667	2	2	3	0
5	6	5	7	5	5	5.5	5	6	6	5.66667	2	2	3	0
5	6	5	6	5	6	5.5	6	6	6	6	2	2	3	0
5	6	5	5	6	5	5.33333	7	5	5	5.66667	2	2	3	0
6	7	7	6	6	7	6.5	5	6	7	6	2	2	3	0
6	6	6	6	6	5	5.83333	5	5	6	5.33333	2	2	3	0
6	5	5	7	6	6	5.83333	6	6	6	6	2	2	3	0
5	4	5	5	6	5	5	4	5	4	4.33333	2	2	3	0
5	4	5	5	6	5	5	4	5	6	5	2	2	3	0
5	4	5	6	6	5	5.16667	4	5	6	5	2	2	3	0
6	6	7	7	6	7	6.5	4	4	5	4.33333	2	2	3	0
7	6	5	6	5	6	5.83333	6	6	6	6	2	2	3	0
5	5	6	6	5	5	5.33333	6	5	5	5.33333	2	2	3	0
5	6	6	6	6	6	5.83333	6	6	5	5.66667	1	2	3	0
7	6	5	6	5	5	5.66667	6	5	6	5.66667	1	2	3	0
6	5	6	6	6	5	5.66667	5	4	4	4.33333	1	2	3	0
3	4	4	4	3	4	3.66667	3	4	4	3.66667	1	2	3	0
5	6	6	4	6	5	5.33333	5	6	5	5.33333	2	2	3	0
6	5	6	6	5	5	5.5	6	6	7	6.33333	2	2	3	0
6	5	7	6	6	6	6	7	6	7	6.66667	2	2	3	0
7	7	7	7	7	7	7	5	6	6	5.66667	2	2	2	1
4	5	6	7	5	7	5.66667	5	7	7	6.33333	2	2	2	1
7	7	4	6	6	7	6.16667	6	6	6	6	2	2	2	1
6	5	6	6	5	4	5.33333	4	5	5	4.66667	2	2	2	1
6	7	7	7	6	7	6.66667	5	6	6	5.66667	2	2	2	1
5	6	6	7	6	7	6.16667	6	5	6	5.66667	2	2	2	1
6	6	6	4	7	4	5.5	7	7	6	6.66667	2	2	2	1
6	5	7	7	7	7	6.5	5	4	5	4.66667	2	2	2	1
6	7	6	6	7	5	6.16667	5	5	6	5.33333	2	2	2	1
4	5	3	5	5	5	4.5	4	7	6	5.66667	2	2	2	1
4	5	7	6	5	5	5.33333	5	7	7	6.33333	2	2	2	1
7	5	5	6	5	5	5.5	5	6	7	6	2	2	2	1
4	5	6	6	5	5	5.16667	4	6	7	5.66667	2	2	2	1
6	5	6	5	7	5	5.66667	5	5	6	5.33333	1	2	2	1
7	5	7	5	7	6	6.16667	5	5	6	5.33333	1	2	2	1
6	7	5	5	6	5	5.66667	7	6	6	6.33333	1	2	2	1
5	6	7	5	6	5	5.66667	5	5	6	5.33333	1	2	2	1
4	5	4	5	4	5	4.5	5	4	5	4.66667	1	2	2	1
6	7	7	5	6	6	6.16667	4	6	6	5.33333	1	2	3	1
6	5	6	6	6	6	5.83333	5	5	6	5.33333	1	2	3	1
6	5	4	6	6	6	5.5	5	6	6	5.66667	2	2	3	1
6	5	6	6	7	7	6.16667	5	5	6	5.33333	2	2	3	1
7	6	6	6	6	6	6.16667	6	5	5	5.33333	2	2	3	1
7	6	3	7	6	5	5.66667	5	6	6	5.66667	2	2	3	1
7	5	6	6	6	6	6	5	6	6	5.66667	1	2	3	1
7	5	5	6	6	7	6	5	6	6	5.66667	1	2	3	1
7	6	6	6	6	7	6.33333	6	6	6	6	2	2	3	1
5	5	5	6	6	5	5.33333	5	7	5	5.66667	2	2	3	1
7	6	7	5	6	6	6.16667	6	5	6	5.66667	2	2	3	1
5	5	5	5	5	5	5	5	4	4	4.33333	2	3	2	0
7	6	6	6	7	6	6.33333	6	7	5	6	1	3	2	0
6	6	5	6	6	6	5.83333	5	4	6	5	2	3	3	0
6	7	7	6	4	7	6.16667	5	6	6	5.66667	1	3	3	1
4	5	3	7	5	5	4.83333	7	7	6	6.66667	1	3	3	1
7	5	7	6	6	4	5.83333	6	6	6	6	1	3	3	1
7	6	6	6	6	6	6.16667	6	6	5	5.66667	1	3	3	1
7	5	7	7	6	6	6.33333	6	6	7	6.33333	1	3	3	1
6	5	4	7	6	7	5.83333	6	6	7	6.33333	1	3	3	1
7	5	6	7	6	4	5.83333	6	6	7	6.33333	1	3	3	1
7	7	6	7	7	7	6.83333	5	6	6	5.66667	1	3	3	1
7	6	6	7	6	6	6.33333	6	6	6	6	1	3	3	1
7	5	6	7	6	6	6.16667	6	6	5	5.66667	1	3	3	1
7	6	6	7	6	7	6.5	6	5	6	5.66667	1	3	3	1
7	6	6	7	6	5	6.16667	5	6	7	6	1	3	3	1
6	5	6	6	6	5	5.66667	6	7	6	6.33333	1	3	3	1
6	5	6	6	6	7	6	6	6	7	6.33333	1	3	3	1
5	5	6	6	5	5	5.33333	4	6	7	5.66667	1	3	3	1
6	7	6	6	5	5	5.83333	6	5	6	5.66667	1	3	3	1
6	5	6	6	6	6	5.83333	6	7	6	6.33333	1	3	3	1
4	5	6	6	5	5	5.16667	6	7	7	6.66667	2	3	3	1
7	6	6	7	6	7	6.5	5	6	6	5.66667	2	3	3	1
7	6	6	6	6	6	6.16667	7	5	6	6	2	3	3	1
4	5	7	7	5	5	5.5	6	6	7	6.33333	2	3	3	1
6	5	6	7	6	6	6	6	7	6	6.33333	2	3	3	1
4	5	6	6	7	6	5.66667	4	7	6	5.66667	2	3	3	1
4	5	3	7	5	5	4.83333	4	6	7	5.66667	2	3	3	1
6	5	7	7	7	5	6.16667	6	6	6	6	2	3	3	1
6	5	6	6	6	6	5.83333	6	6	6	6	2	3	3	1
6	5	6	6	6	3	5.33333	6	6	6	6	2	3	3	1
7	6	7	6	7	7	6.66667	6	5	6	5.66667	2	3	3	1
6	5	7	7	5	7	6.16667	5	6	6	5.66667	2	3	3	1
6	7	7	7	7	7	6.83333	6	5	6	5.66667	2	3	3	1
7	5	7	7	5	5	6	4	6	7	5.66667	2	3	3	1
6	5	6	6	6	6	5.83333	6	6	6	6	1	3	3	1
6	7	6	6	7	7	6.5	7	5	5	5.66667	1	3	3	1
7	7	6	6	7	5	6.33333	7	6	6	6.33333	1	3	4	1
3	5	6	5	6	7	5.33333	8	6	6	6.66667	1	3	4	1
4	5	7	5	5	5	5.16667	7	6	7	6.66667	1	3	4	1
7	6	6	6	7	6	6.33333	7	6	6	6.33333	1	3	4	1
7	6	5	7	6	6	6.16667	7	5	6	6	1	3	4	1
7	5	6	6	6	4	5.66667	7	6	6	6.33333	1	3	4	1
4	5	6	6	5	5	5.16667	4	6	7	5.66667	2	3	4	1
4	7	5	7	7	6	6	5	6	6	5.66667	2	3	4	1
4	5	6	7	5	5	5.33333	7	7	7	7	2	3	4	1
6	6	5	6	7	6	6	6	5	6	5.66667	2	3	4	1
7	6	6	7	6	5	6.16667	6	6	6	6	2	3	4	1
6	5	6	5	6	5	5.5	6	6	7	6.33333	1	3	4	1
5	5	4	5	5	5	4.83333	4	5	4	4.33333	1	4	2	0
6	7	6	6	5	6	6	6	5	6	5.66667	2	4	2	0
6	5	6	5	7	6	5.83333	7	6	6	6.33333	1	4	3	0
6	6	6	6	5	6	5.83333	6	5	6	5.66667	1	4	3	0
6	5	6	6	7	6	6	7	6	6	6.33333	1	4	3	0
6	6	6	6	6	5	5.83333	6	5	5	5.33333	2	4	4	0
4	5	5	4	4	4	4.33333	5	5	6	5.33333	2	4	4	0
7	5	6	5	6	7	6	6	6	7	6.33333	1	4	2	1
4	5	6	5	5	5	5	5	7	7	6.33333	2	4	2	1
3	7	6	6	7	6	5.83333	6	6	6	6	2	4	3	1
7	3	6	6	5	4	5.16667	4	6	6	5.33333	1	4	3	1
6	5	5	6	6	7	5.83333	6	7	6	6.33333	2	4	3	1
7	7	7	7	6	6	6.66667	6	6	6	6	2	4	3	1
7	5	7	3	6	7	5.83333	5	6	6	5.66667	1	4	3	1
7	5	3	6	6	7	5.66667	5	6	6	5.66667	2	4	3	1
6	4	5	6	5	5	5.16667	4	6	4	4.66667	1	5	4	0
6	5	7	5	6	5	5.66667	5	5	5	5	2	5	2	1
7	7	6	5	7	6	6.33333	6	6	7	6.33333	2	5	3	1
